# Supplementary material for: Optimization of the carbonization temperature and composition of FeCC composites for enhanced lithium-ion battery anode performance
Source: Royal Society of Chemistry journal article supplement (doi:10.1039/d5ma00782h), 2025-01-01
Supplement: d5ma00782h1.pdf [file d5ma00782h1.pdf]

## SUPPORTING INFORMATION

### Optimization of Carbonization and Composition in FeCC Composites for Enhanced Lithium-Ion Battery Anode Performance

Do Thao Anh<sup>a,b</sup>, Nguyen Bao Tran<sup>b,c</sup>, Quang Ngoc Tran<sup>a,b</sup>, Hanh Kieu Thi Ta<sup>a,b,c</sup>, Bach Thang Phan<sup>a,b,d</sup>, Tuan Loi Nguyen<sup>e,f</sup>, Nhu Hoa Thi Tran<sup>b,c,\*</sup>

---

<sup>a.</sup> *Advanced Materials Technology Institute Vietnam National University Ho Chi Minh city (formerly affiliated with Center for Innovative Materials and Architectures), Ho Chi Minh City, Viet Nam*

<sup>b.</sup> *Viet Nam National University, Ho Chi Minh City, Viet Nam*

<sup>c.</sup> *Faculty of Materials Science and Technology, University of Science, Ho Chi Minh City, Vietnam*

<sup>d.</sup> *University of Health Sciences, Vietnam National University Ho Chi Minh City, Viet Nam*

<sup>e.</sup> *Institute of Fundamental and Applied Sciences, Duy Tan University, Ho Chi Minh City, Vietnam*

<sup>f.</sup> *Faculty of Environmental and Chemical Engineering, Duy Tan University, Da Nang City, Vietnam*

\* Corresponding author: Nhu Hoa Thi Tran (Email: [ttnhoa@hcmus.edu.vn](mailto:ttnhoa@hcmus.edu.vn))

**Chemical and reagent.** Cobaltous nitrate ( $\text{Co}(\text{NO}_3)_2 \cdot 6\text{H}_2\text{O}$ ,  $\geq 98\%$ ), 2-methylimidazole ( $\text{C}_4\text{H}_6\text{N}_2$ , Hmim, 99 %), polyvinylpyrrolidone ( $(\text{C}_6\text{H}_9\text{NO})_n$ , PVP,  $M_w \sim 55.000$ ), sodium citrate tribasic dihydrate ( $\text{C}_6\text{H}_5\text{Na}_3\text{O}_7 \cdot 2\text{H}_2\text{O}$ , 99 %), ammonium hydroxide ( $\text{NH}_4\text{OH}$ , 30%  $\text{NH}_3$  basic), ferrous chloride tetrahydrate ( $\text{FeCl}_2 \cdot 4\text{H}_2\text{O}$ , 99.9 %), ferric chloride hexahydrate ( $\text{FeCl}_3 \cdot 6\text{H}_2\text{O}$ , 97 %), super P (C, 99 %), polyvinylidene fluoride (PVDF,  $M_w \sim 534.000$ ), and 1-Methyl-2-pyrrolidone (NMP, 99 %) were all purchased from Sigma-Aldrich Inc. (St. Louis, MO, USA). De-ionized (DI) water (Thermo Scientific Easypure II, Göteborg, Sweden), produced at the Center for Innovative Materials and Architectures (INOMAR), Vietnam National University, Ho Chi Minh City (VNU-HCM), was utilized for all sample preparations.

**Material characterization.** Powder X-ray diffraction (PXRD, Bruker D8 Advance diffractometer,  $\lambda$  is 1.54178 Å) and Fourier-transform infrared spectroscopy (FTIR, Bruker Vertex 70) were used to analyze the crystal structure and the composition and chemical functions of the samples. Field emission scanning electron microscope (FESEM, Hitachi S4800, USA) operated at an accelerating voltage of 5 kV and an energy dispersive X-ray spectroscope (EDS) installed in the equipment. High-resolution TEM (HR-TEM) images were obtained using a JEM-ARM200F (JEOL) instrument. Further, the structural features were examined using X-ray photoelectron spectroscopic (XPS) measurements.

**Electrochemical measurements.** Galvanostatic charge-discharge (GCD) cycling was conducted at a constant current density of 100  $\text{mA g}^{-1}$  over a potential window of 0.01 – 3.00 V (vs  $\text{Li}/\text{Li}^+$ ) using a battery cycler system (NEWARE). Electrochemical impedance spectroscopy (EIS) was carried out using a Gamry (1010E) across frequencies ranging from 100 kHz to 100 mHz. Cyclic voltammetry (CV) was also performed at scan rates of 0.3 – 1.2  $\text{mV s}^{-1}$  over 0.01 – 3.00 V (vs  $\text{Li}/\text{Li}^+$ ) on Arbin instrument. The CV response of the anode provided insights into the lithiation/delithiation kinetics and facilitated analysis of the reaction kinetics at the anode electrode.

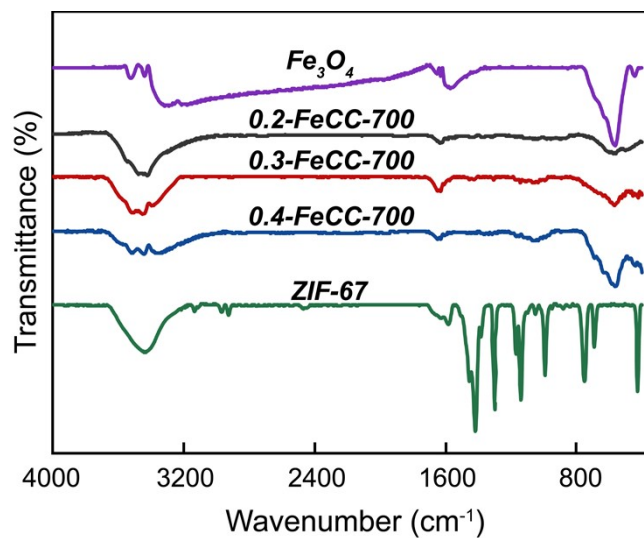

**Figure S1.** FTIR spectra of  $\text{Fe}_3\text{O}_4$ , ZIF-67, 0.2-FeCC-700, 0.3-FeCC-700 and 0.4-FeCC-700 samples.

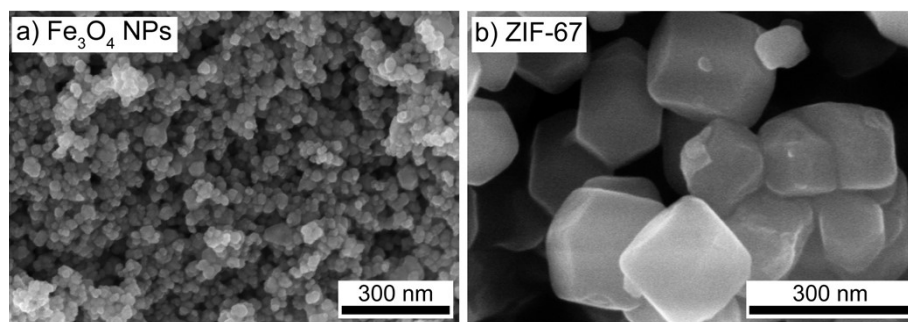

**Figure S2.** FESEM images of (a)  $\text{Fe}_3\text{O}_4$  NPs and (b) ZIF-67 rhombic dodecahedron.

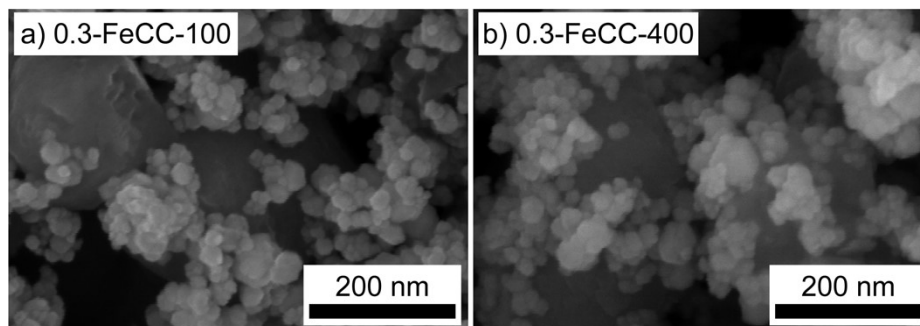

**Figure S3.** FESEM images of (a) 0.3-FeCC-100; (b) 0.3- FeCC-400 hybrid composite.

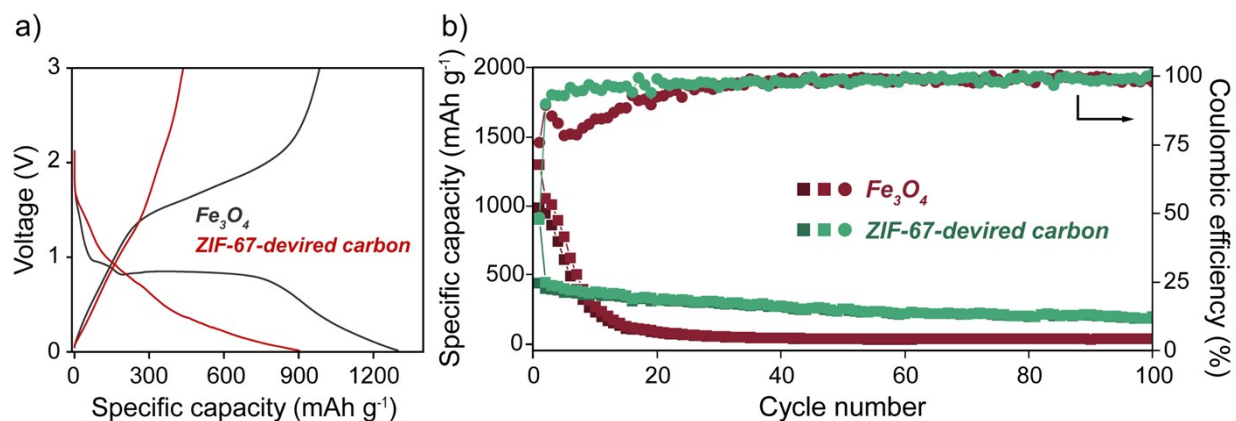

**Figure S4.** (a) Galvanostatic charge/discharge curves at first cycle; (b) Coulombic efficiency of  $\text{Fe}_3\text{O}_4$  and ZIF-67-derived carbon anode electrodes.

**Table S1.** Cycling performance of Fe-based or MOF-derived anode electrodes previously reported.

| Anode material                                                              | Cycling performance           | Current density        | Cycle number | Ref              |
|-----------------------------------------------------------------------------|-------------------------------|------------------------|--------------|------------------|
| Hybrid nanoporous carbons (HPCs)                                            | 332 $\text{mAh g}^{-1}$       | 50 $\text{mA g}^{-1}$  | 100          | [1]              |
| $\alpha\text{-Fe}_2\text{O}_3@\text{Fe}_3\text{O}_4$ on carbon fiber fabric | 328.6 $\text{mAh g}^{-1}$     | 25 $\text{mA g}^{-1}$  | 100          | [2]              |
| CoP                                                                         | 191 $\text{mAh g}^{-1}$       | 100 $\text{mA g}^{-1}$ | 100          | [3]              |
| NC-ZIF                                                                      | 279.73 $\text{mAh g}^{-1}$    | 200 $\text{mA g}^{-1}$ | 100          | [4]              |
| Fe-Co-700                                                                   | $\sim 400 \text{ mAh g}^{-1}$ | 500 $\text{mA g}^{-1}$ | 100          | [5]              |
| $\text{FeS}_2$                                                              | 61 $\text{mA h g}^{-1}$       | 100 $\text{mA g}^{-1}$ | 100          | [6]              |
| Sn/C                                                                        | 310.6 $\text{mAh g}^{-1}$     | 100 $\text{mA g}^{-1}$ | 300          | [7]              |
| Co-TBA                                                                      | 433.9 $\text{mAh g}^{-1}$     | 100 $\text{mA g}^{-1}$ | 100          | [8]              |
| 0.2-FeCC-700                                                                | 256 $\text{mAh g}^{-1}$       | 100 $\text{mA g}^{-1}$ | 80           | <b>This work</b> |
| 0.3-FeCC-700                                                                | 447 $\text{mAh g}^{-1}$       |                        |              |                  |
| 0.4-FeCC-700                                                                | 344 $\text{mAh g}^{-1}$       |                        |              |                  |

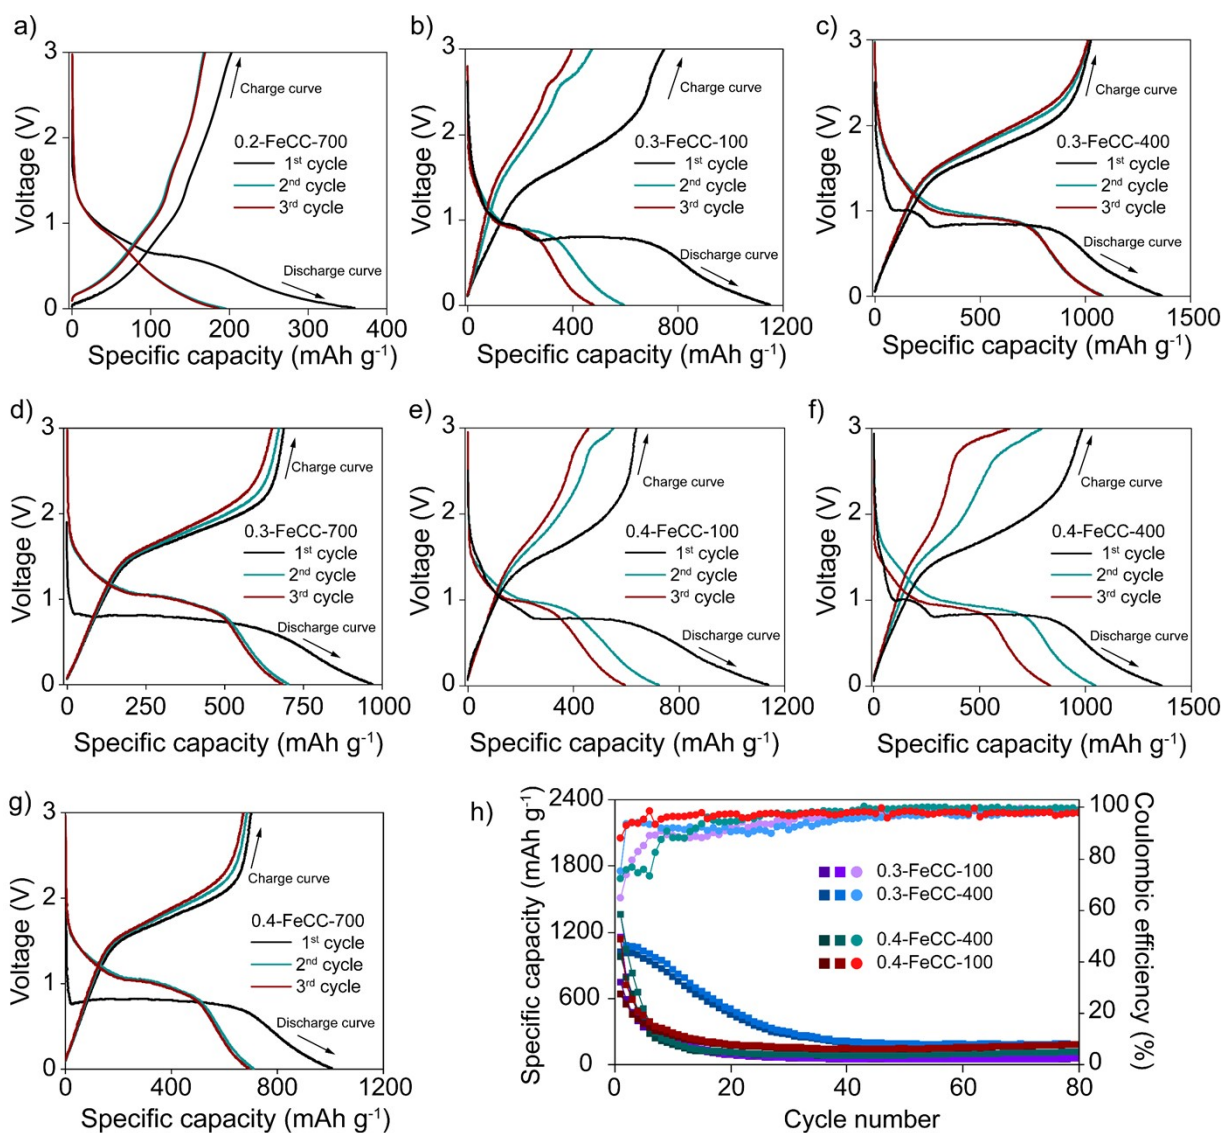

**Figure S5.** (a-g) The galvanostatic charge/discharge curves of  $x$ -FeCC- $y$  anode electrodes under the first three cycles and (h) Coulombic efficiency of 0.3-FeCC-100, 0.3-FeCC-400, 0.4-FeCC-100 and 0.4-FeCC-400 anode electrodes.

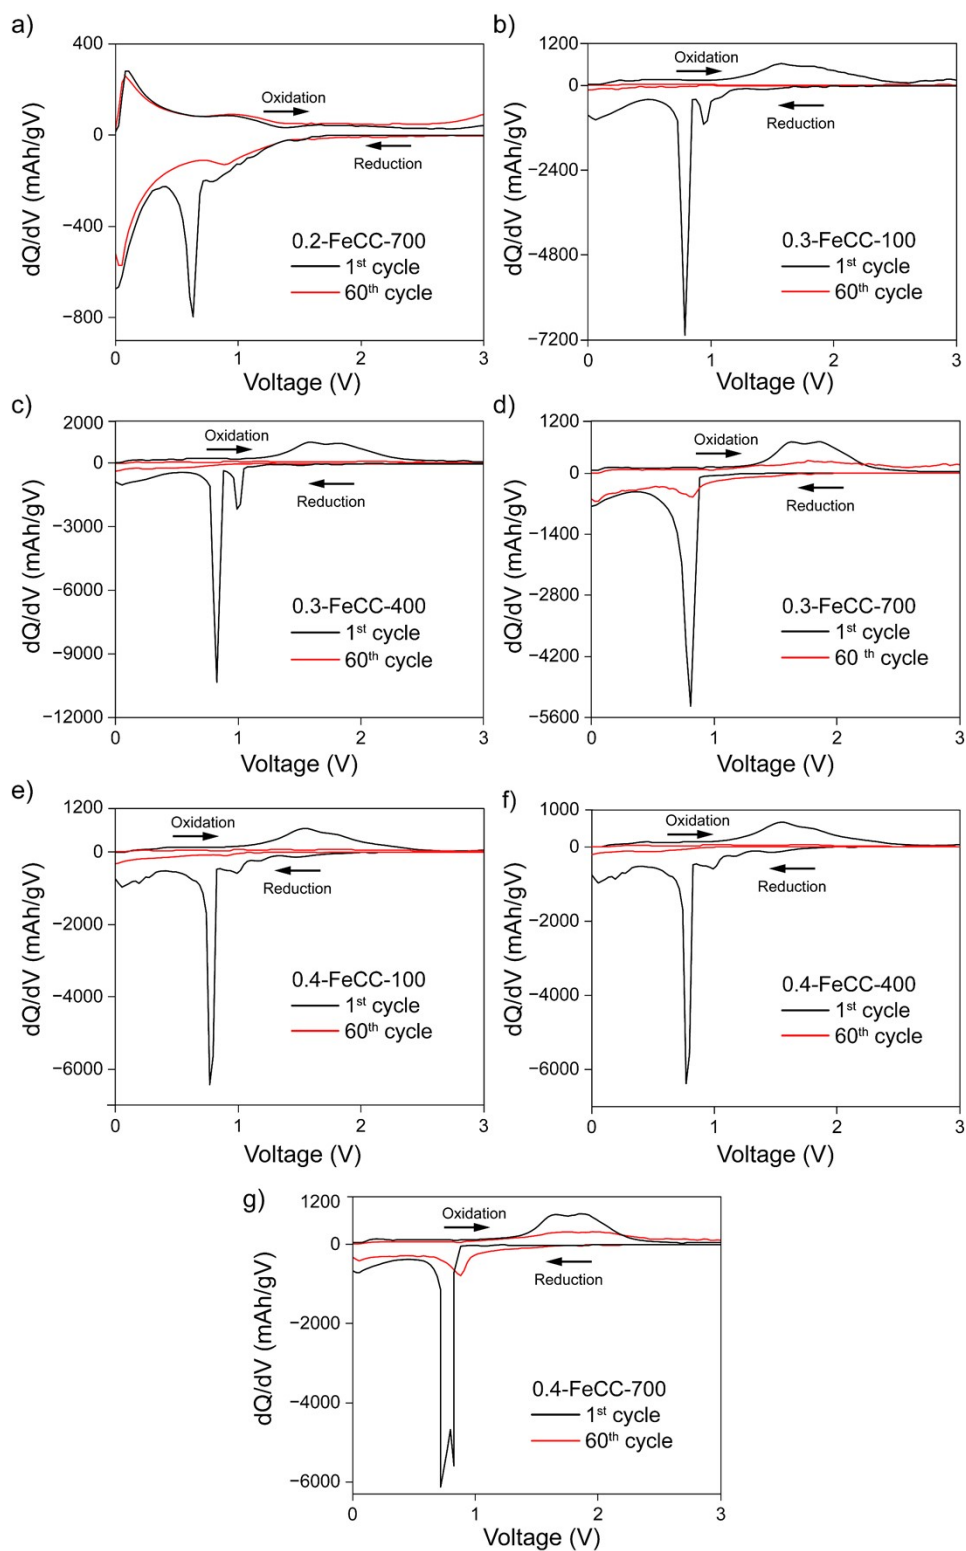

**Figure S6.** Differential capacity ( $dQ/dV$ ) plots of the 1st and 60th cycles for the x-FeCC-y anode electrode.

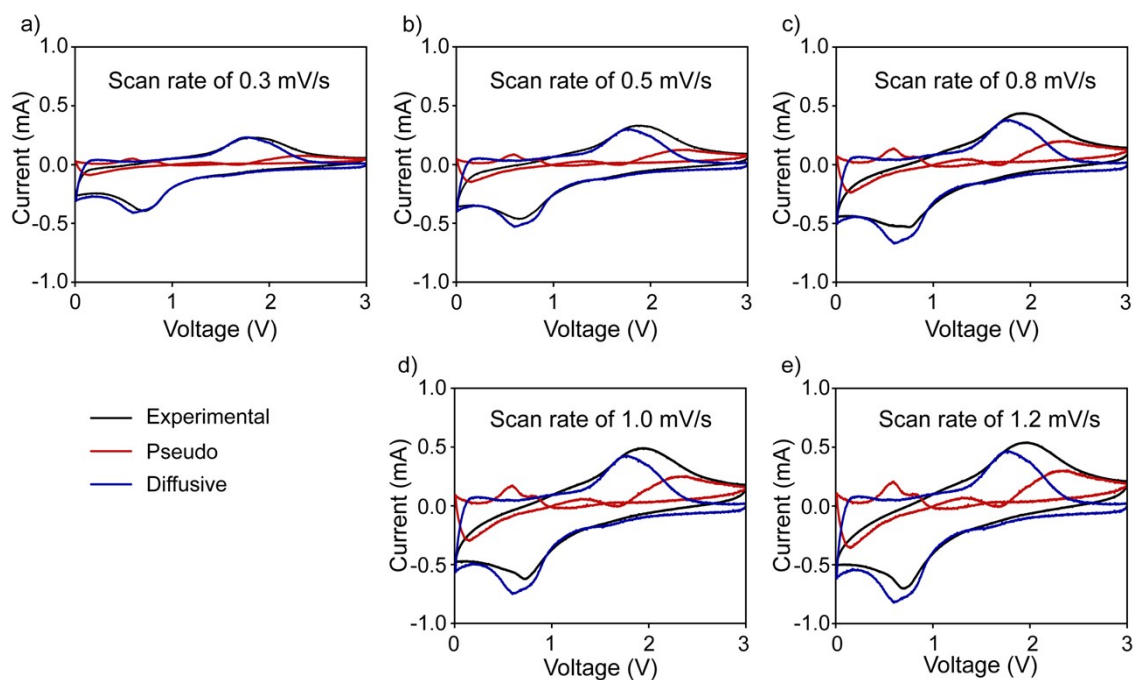

**Figure S7.** (a – e) Details of pseudo and diffusive curves at various scan rates of 0.3-FeCC-700 electrode.

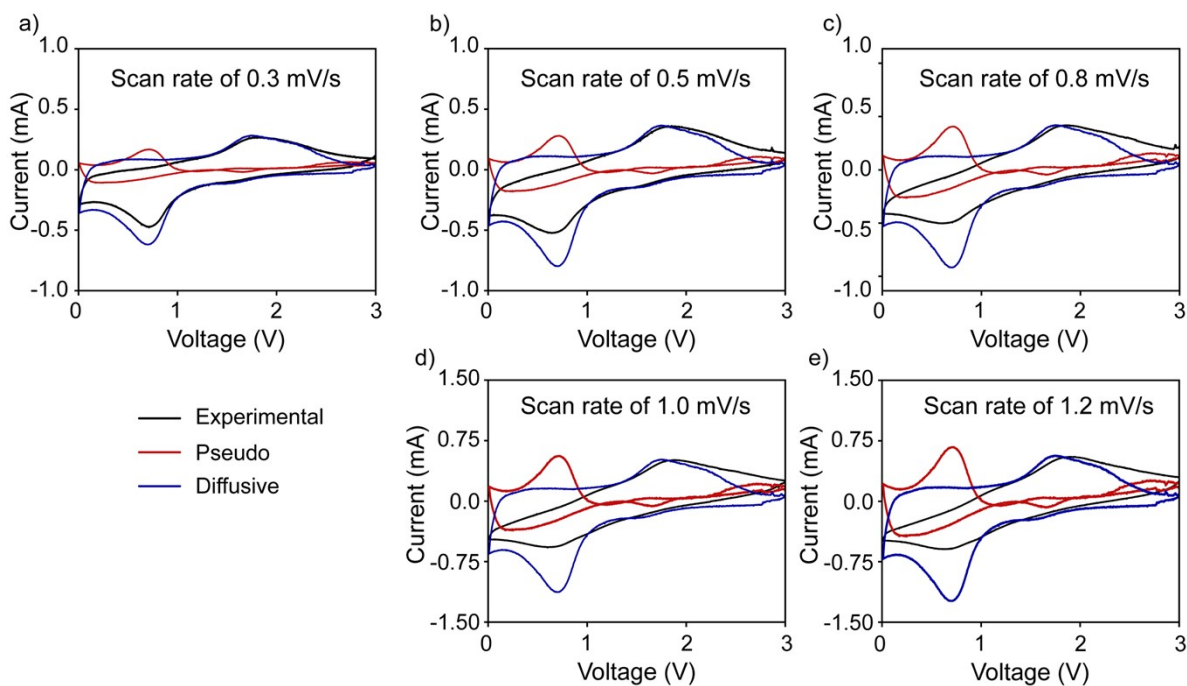

**Figure S8.** (a – e) Details of pseudo and diffusive curves at various scan rates of 0.4-FeCC-700 electrode.



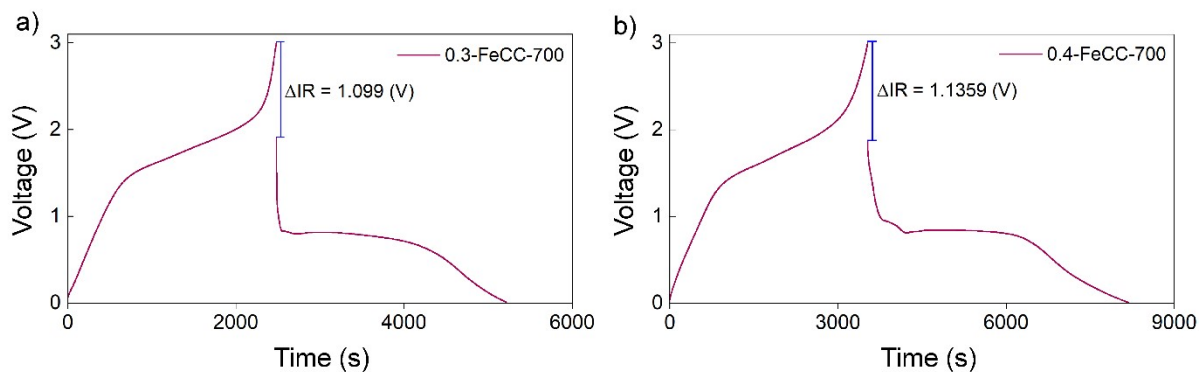

**Figure S9.** Illustration of the potential drop in the interval between charge and discharge of (a) 0.3-FeCC-700 and (b) 0.4-FeCC-700 electrodes.

**Table S2.** The potential values corresponding to the oxidation and reduction peaks in the third-cycle CV curves at a scan rate of  $0.3 \text{ mV s}^{-1}$  for the 0.3-FeCC-700 and 0.4-FeCC-700 electrodes.

| Anode electrode                                                                                                                                                                      | $E_{p\text{-anodic}} \text{ (V)}$ | $E_{p\text{-cathodic}} \text{ (V)}$ | $\Delta E_p \text{ (V)}$ |
|--------------------------------------------------------------------------------------------------------------------------------------------------------------------------------------|-----------------------------------|-------------------------------------|--------------------------|
| 0.3-FeCC-700                                                                                                                                                                         | 1.94                              | 0.86                                | 1.08                     |
| 0.4-FeCC-700                                                                                                                                                                         | 1.98                              | 0.85                                | 1.13                     |
| $E_{p\text{-anodic}}$ is the potential value (V) at the oxidation peak of the CV curve.<br>$E_{p\text{-cathodic}}$ is the potential value (V) at the reduction peak of the CV curve. |                                   |                                     |                          |



## References

- [1] M. Guo, T. Gao, H. Ma, H. Li, Weaving ZIF-67 by employing carbon nanotubes to constitute hybrid anode for lithium ions battery, *Mater Lett* 212 (2018) 143–146. <https://doi.org/10.1016/J.MATLET.2017.10.091>.
- [2] A. González-Banciella, D. Martinez-Diaz, J. de Prado, M.V. Utrilla, M. Sánchez, A. Ureña, MOF-derived  $\alpha$ -Fe<sub>2</sub>O<sub>3</sub>@Fe<sub>3</sub>O<sub>4</sub> on carbon fiber fabric for lithium-ion anode applications, *J Energy Storage* 90 (2024) 111904. <https://doi.org/10.1016/J.EST.2024.111904>.
- [3] Y. Liu, X. Que, X. Wu, Q. Yuan, H. Wang, J. Wu, Y. Gui, W. Gan, ZIF-67 derived carbon wrapped discontinuous CoxP nanotube as anode material in high-performance Li-ion battery, *Mater Today Chem* 17 (2020) 100284. <https://doi.org/10.1016/J.MTCHEM.2020.100284>.
- [4] M. Wang, F. Xi, S. Li, W. Ma, X. Wan, Z. Tong, B. Luo, ZIF-67-derived porous nitrogen-doped carbon shell encapsulates photovoltaic silicon cutting waste as anode in high-performance lithium-ion batteries, *Journal of Electroanalytical Chemistry* 931 (2023) 117210. <https://doi.org/10.1016/J.JELECTHEM.2023.117210>.
- [5] X.-N. Lv, P.-F. Wang, Y.-H. Zhang, Q. Shi, F.-N. Shi, MOF-derived CoFe<sub>2</sub>O<sub>4</sub>/FeO/Fe nanocomposites as anode materials for high-performance lithium-ion batteries, *J Alloys Compd* 923 (2022) 166316. <https://doi.org/10.1016/j.jallcom.2022.166316>.
- [6] W. Yin, W. Li, K. Wang, W. Chai, W. Ye, Y. Rui, B. Tang, FeS<sub>2</sub>@Porous octahedral carbon derived from metal-organic framework as a stable and high capacity anode for lithium-ion batteries, *Electrochim Acta* 318 (2019) 673–682. <https://doi.org/10.1016/J.ELECTACTA.2019.05.152>.
- [7] Y. Cui, Z. Xu, H. Qiu, D. Jin, Enhanced cycling stability of lithium-ion batteries with Sn-MOF derived Sn anodes encapsulated within a three-dimensional carbon framework, *Solid State Sci* 163 (2025) 107920. <https://doi.org/10.1016/J.SOLIDSTATESCIENCES.2025.107920>.
- [8] L. Wang, J. Chen, H. Yang, H. Dong, Y. Yu, J. Sun, J. Sha, Co<sub>3</sub>O<sub>4</sub>@C nanocomposites derived from the thermal decomposition of Co-based metal-organic frameworks for lithium

storage, J Solid State Chem 345 (2025) 125239.  
<https://doi.org/10.1016/J.JSSC.2025.125239>.
